# Supplementary material
Source: PubMed Central journal article supplement (PMC5953379)
Supplement: tpmd170808.SD1.pdf [file tpmd170808.SD1.pdf]

SUPPLEMENTAL TABLE 1

Comparison of the LAMP test results targeting the 18S rRNA gene from DNAs retrieved from sandflies and direct smears

| ID | Type of sample                  | Microscopy result | qPCR result | Ct (average) | LAMP result |
|----|---------------------------------|-------------------|-------------|--------------|-------------|
| 1  | Smear                           | Negative          | Negative    | ND           | Negative    |
| 2  | Smear                           | Positive          | Positive    | 29.92        | Positive    |
| 3  | Smear                           | Positive          | Positive    | 29.2         | Positive    |
| 4  | Smear                           | Positive          | Positive    | 30.89        | Positive    |
| 5  | Smear                           | Negative          | Negative    | ND           | Negative    |
| 6  | Smear                           | Positive          | Positive    | 25.47        | Positive    |
| 7  | Smear                           | Positive          | Positive    | 29.62        | Positive    |
| 8  | Smear                           | Positive          | Positive    | 27.35        | Positive    |
| 9  | Smear                           | Negative          | Negative    | ND           | Negative    |
| 10 | Smear                           | Positive          | Positive    | 29.4         | Positive    |
| 11 | Smear                           | Positive          | Positive    | 29.14        | Positive    |
| 12 | Smear                           | Negative          | Negative    | ND           | Negative    |
| 13 | Smear                           | Positive          | Positive    | 26.56        | Positive    |
| 14 | Smear                           | Negative          | Negative    | ND           | Negative    |
| 15 | Smear                           | Negative          | Negative    | ND           | Negative    |
| 16 | Smear                           | Positive          | Positive    | 29.4         | Positive    |
| 17 | Smear                           | Positive          | Positive    | 30.54        | Positive    |
| 18 | Smear                           | Positive          | Positive    | 27.29        | Positive    |
| 19 | Smear                           | Negative          | Positive    | 30.62        | Positive    |
| 20 | Smear                           | Positive          | Positive    | 30.03        | Positive    |
| 21 | Smear                           | Positive          | Positive    | 29.85        | Positive    |
| 22 | Smear                           | Positive          | Positive    | 28.11        | Positive    |
| 23 | Smear                           | Negative          | Negative    | ND           | Negative    |
| 24 | Smear                           | Positive          | Positive    | 29.23        | Positive    |
| 25 | Smear                           | Positive          | Positive    | 30.79        | Positive    |
| 26 | Smear                           | Negative          | Positive    | 29.07        | Positive    |
| 27 | Smear                           | Positive          | Positive    | 27.25        | Positive    |
| 28 | Smear                           | Positive          | Positive    | 29.33        | Positive    |
| 29 | Smear                           | Positive          | Positive    | 26.48        | Positive    |
| 30 | Smear                           | Negative          | Negative    | ND           | Negative    |
| 31 | Smear                           | Positive          | Positive    | 29.27        | Positive    |
| 32 | Smear                           | Positive          | Positive    | 30.47        | Positive    |
| 33 | Smear                           | Positive          | Positive    | 27.42        | Positive    |
| 34 | Smear                           | Positive          | Positive    | 26.07        | Positive    |
| 35 | Smear                           | Negative          | Negative    | ND           | Negative    |
| 36 | Smear                           | Positive          | Positive    | 29.89        | Positive    |
| 37 | Smear                           | Positive          | Positive    | 29.27        | Positive    |
| 38 | Smear                           | Positive          | Positive    | 30.03        | Positive    |
| 39 | Smear                           | Negative          | Positive    | 29.7         | Positive    |
| 40 | Smear                           | Positive          | Positive    | 25.28        | Positive    |
| 41 | Smear                           | Negative          | Negative    | ND           | Negative    |
| 42 | Smear                           | Positive          | Positive    | 30.43        | Positive    |
| 43 | Smear                           | Positive          | Positive    | 28.37        | Positive    |
| 44 | Smear                           | Positive          | Positive    | 29.62        | Positive    |
| 45 | Smear                           | Positive          | Positive    | 29.35        | Positive    |
| 46 | Smear                           | Negative          | Negative    | ND           | Positive    |
| 47 | Smear                           | Positive          | Positive    | 29.4         | Positive    |
| 48 | Smear                           | Positive          | Positive    | 29.14        | Positive    |
| 49 | Smear                           | Positive          | Positive    | 27.45        | Positive    |
| 50 | Smear                           | Positive          | Positive    | 28.65        | Positive    |
| 51 | <i>Psychodopygus panamensis</i> | NA                | Positive    | 19.61        | Positive    |
| 52 | <i>P. panamensis</i>            | NA                | Positive    | 21.01        | Positive    |
| 53 | <i>P. panamensis</i>            | NA                | Positive    | 23.73        | Positive    |
| 54 | <i>P. panamensis</i>            | NA                | Negative    | ND           | Negative    |
| 55 | <i>P. panamensis</i>            | NA                | Positive    | 25.79        | Positive    |
| 56 | <i>P. panamensis</i>            | NA                | Negative    | ND           | Negative    |
| 57 | <i>P. panamensis</i>            | NA                | Negative    | ND           | Negative    |
| 58 | <i>P. panamensis</i>            | NA                | Positive    | 22.3         | Positive    |
| 59 | <i>P. panamensis</i>            | NA                | Positive    | 20.87        | Positive    |
| 60 | <i>P. panamensis</i>            | NA                | Positive    | 25.33        | Positive    |
| 61 | <i>P. panamensis</i>            | NA                | Positive    | 26.4         | Positive    |
| 62 | <i>P. panamensis</i>            | NA                | Negative    | ND           | Negative    |
| 63 | <i>P. panamensis</i>            | NA                | Positive    | 18.57        | Positive    |
| 64 | <i>P. panamensis</i>            | NA                | Positive    | 23.73        | Positive    |
| 65 | <i>P. panamensis</i>            | NA                | Negative    | ND           | Negative    |
| 66 | <i>P. panamensis</i>            | NA                | Negative    | ND           | Negative    |
| 67 | <i>P. panamensis</i>            | NA                | Negative    | ND           | Negative    |
| 68 | <i>P. panamensis</i>            | NA                | Positive    | 28.33        | Positive    |
| 69 | <i>P. panamensis</i>            | NA                | Positive    | 20.28        | Positive    |

(continued)

SUPPLEMENTAL TABLE 1

Continued

| ID  | Type of sample                   | Microscopy result | qPCR result | Ct (average) | LAMP result |
|-----|----------------------------------|-------------------|-------------|--------------|-------------|
| 70  | <i>P. panamensis</i>             | NA                | Positive    | 18.35        | Positive    |
| 71  | <i>P. panamensis</i>             | NA                | Positive    | 16.03        | Positive    |
| 72  | <i>P. panamensis</i>             | NA                | Positive    | 19.39        | Positive    |
| 73  | <i>P. panamensis</i>             | NA                | Positive    | 25.01        | Positive    |
| 74  | <i>P. panamensis</i>             | NA                | Positive    | 26.4         | Positive    |
| 75  | <i>P. panamensis</i>             | NA                | Negative    | ND           | Negative    |
| 76  | <i>P. panamensis</i>             | NA                | Negative    | ND           | Negative    |
| 77  | <i>P. panamensis</i>             | NA                | Negative    | ND           | Negative    |
| 78  | <i>P. panamensis</i>             | NA                | Positive    | 22.98        | Positive    |
| 79  | <i>P. panamensis</i>             | NA                | Positive    | 17.23        | Positive    |
| 80  | <i>P. panamensis</i>             | NA                | Positive    | 24.99        | Positive    |
| 81  | <i>Micropygomyia cayennensis</i> | NA                | Negative    | ND           | Negative    |
| 82  | <i>M. cayennensis</i>            | NA                | Negative    | ND           | Negative    |
| 83  | <i>M. cayennensis</i>            | NA                | Negative    | ND           | Negative    |
| 84  | <i>M. cayennensis</i>            | NA                | Negative    | ND           | Negative    |
| 85  | <i>M. cayennensis</i>            | NA                | Negative    | ND           | Negative    |
| 86  | <i>M. cayennensis</i>            | NA                | Negative    | ND           | Negative    |
| 87  | <i>M. cayennensis</i>            | NA                | Negative    | ND           | Negative    |
| 88  | <i>M. cayennensis</i>            | NA                | Negative    | ND           | Negative    |
| 89  | <i>M. cayennensis</i>            | NA                | Negative    | ND           | Negative    |
| 90  | <i>M. cayennensis</i>            | NA                | Negative    | ND           | Negative    |
| 91  | <i>M. cayennensis</i>            | NA                | Negative    | ND           | Negative    |
| 92  | <i>M. cayennensis</i>            | NA                | Negative    | ND           | Negative    |
| 93  | <i>Lutzomyia gomezi</i>          | NA                | Negative    | ND           | Negative    |
| 94  | <i>L. gomezi</i>                 | NA                | Negative    | ND           | Negative    |
| 95  | <i>L. gomezi</i>                 | NA                | Negative    | ND           | Negative    |
| 96  | <i>L. gomezi</i>                 | NA                | Negative    | ND           | Negative    |
| 97  | <i>L. gomezi</i>                 | NA                | Negative    | ND           | Negative    |
| 98  | <i>L. gomezi</i>                 | NA                | Negative    | ND           | Negative    |
| 99  | <i>L. gomezi</i>                 | NA                | Negative    | ND           | Negative    |
| 100 | <i>L. gomezi</i>                 | NA                | Negative    | ND           | Negative    |

Ct = cycle of threshold; LAMP = loop-mediated isothermal amplification; NA = not applied; ND = not detectable; qPCR = real-time polymerase chain reaction.
